# Supplementary material
Source: publisher site journal article supplement (https://www.dovepress.com/article/190814)

HT29 shNC Colonospheres

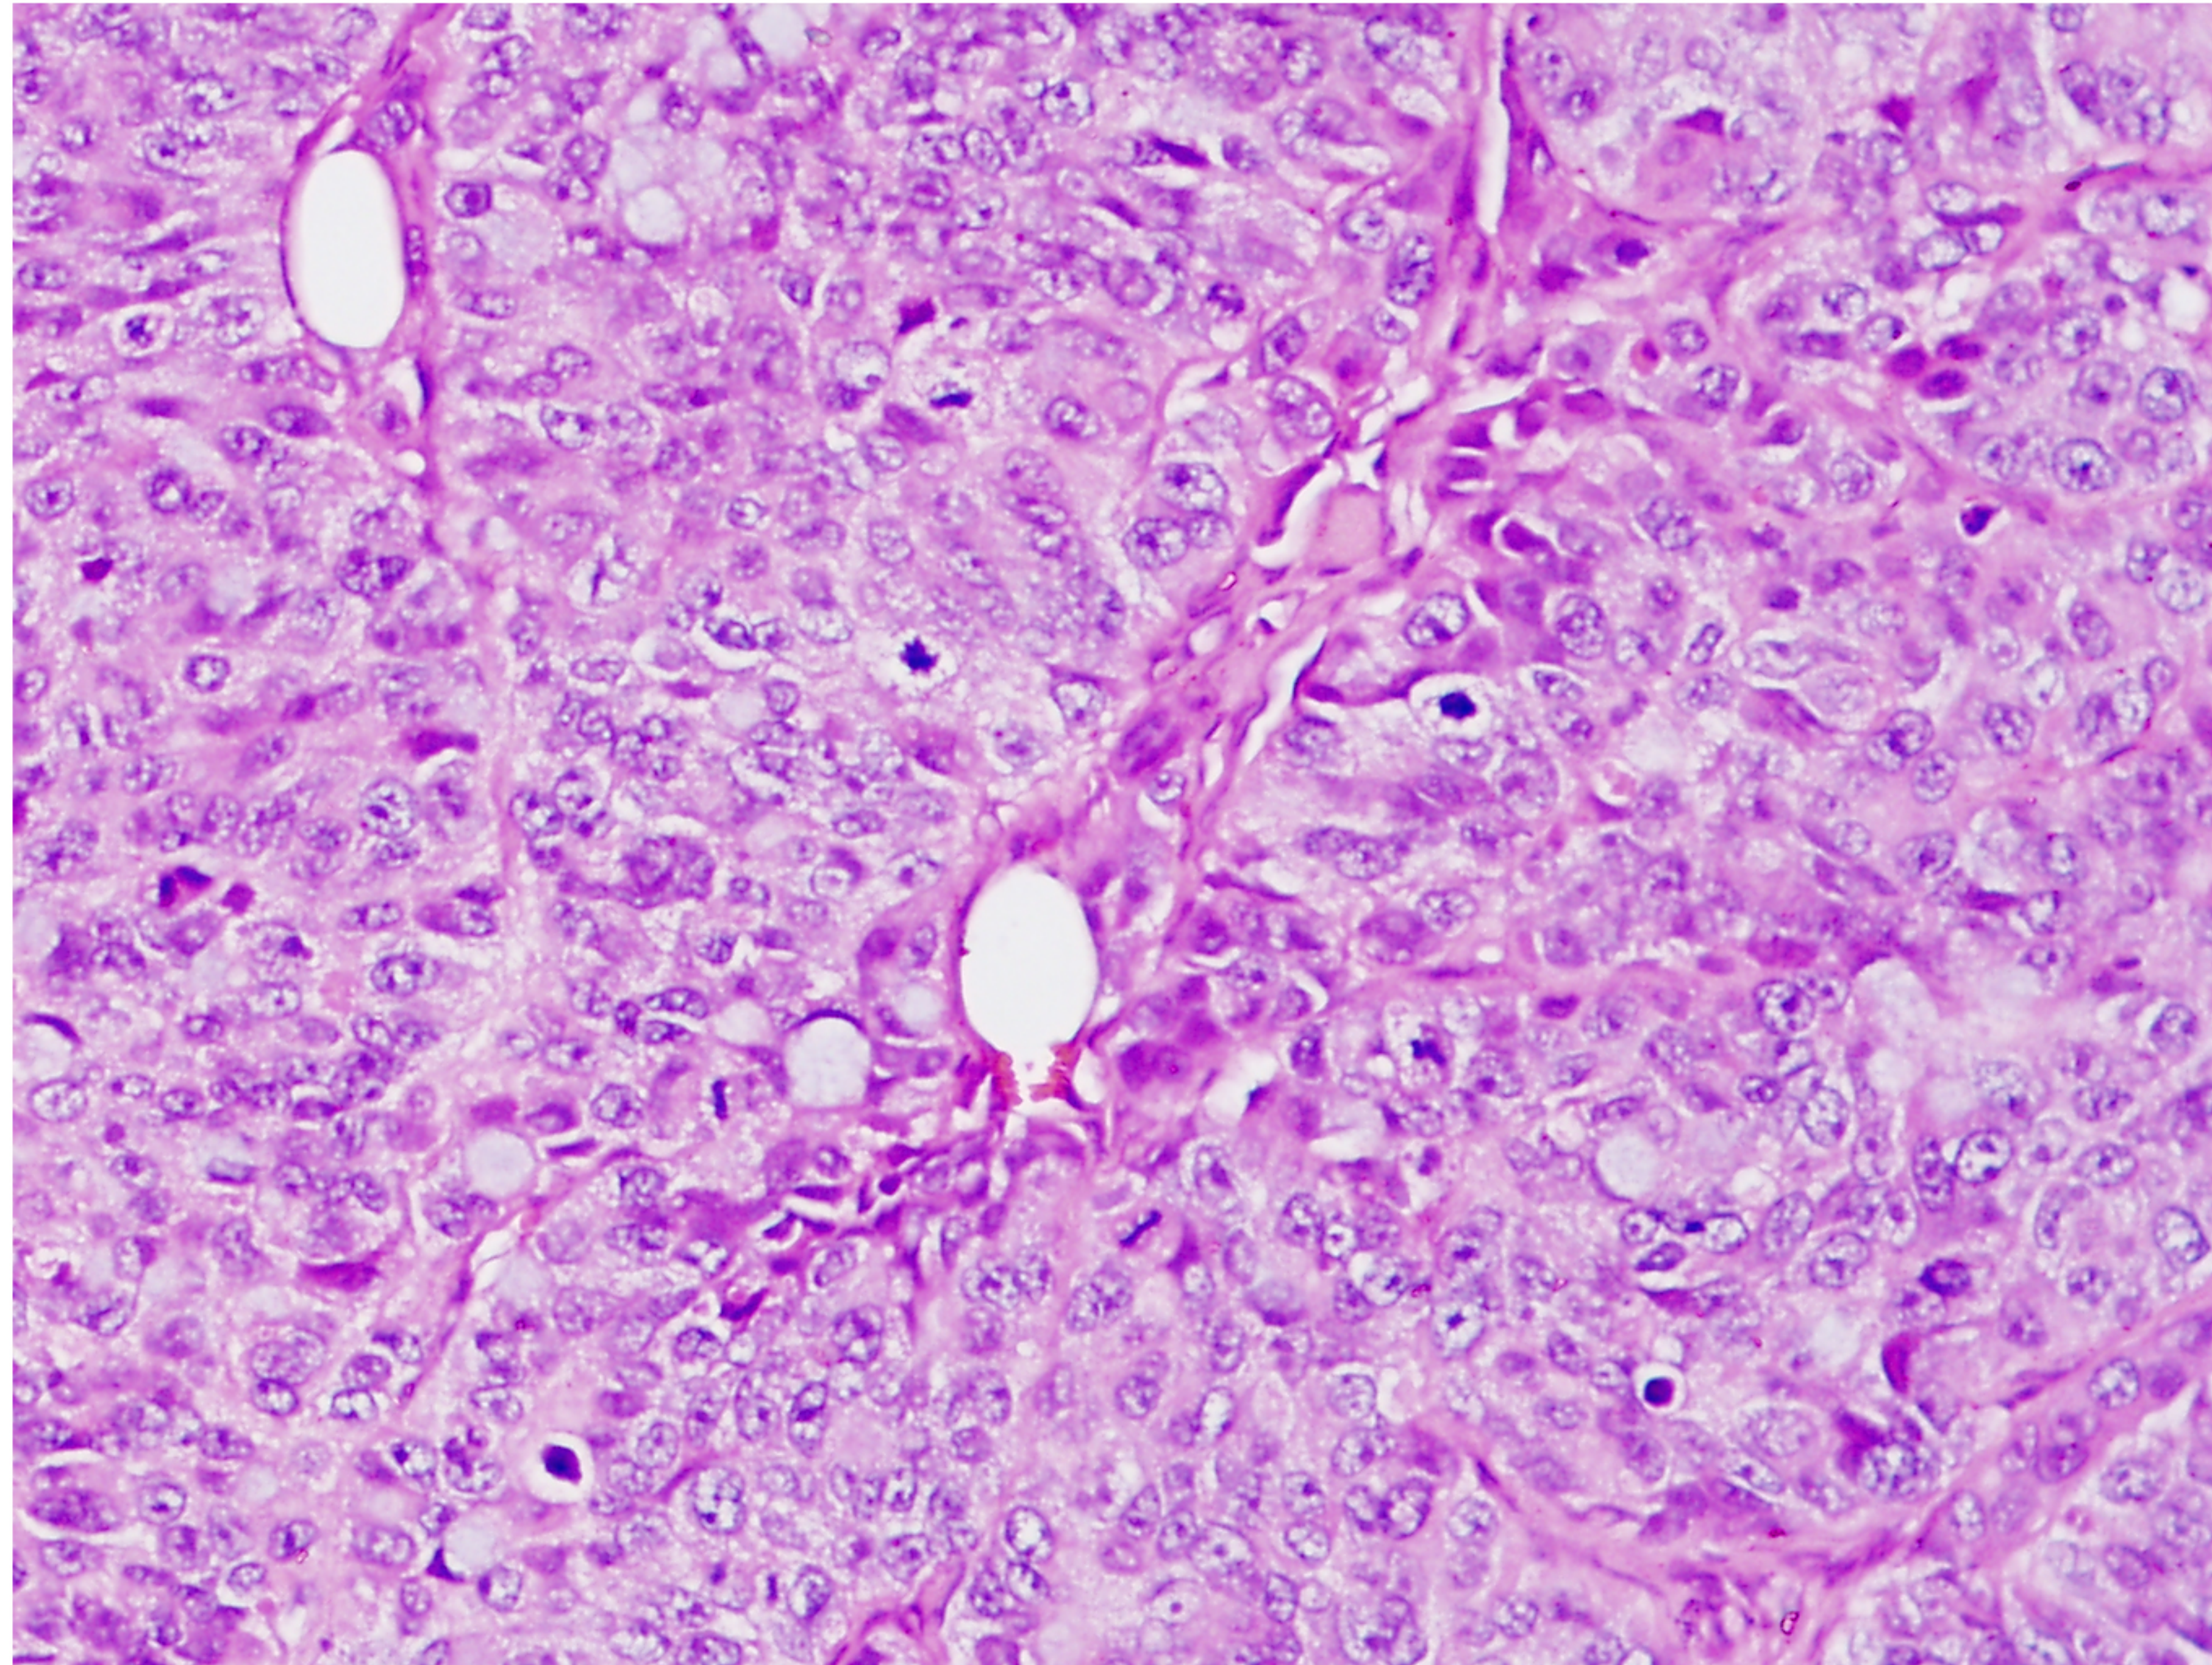

HT29 shDDX27 Colonospheres

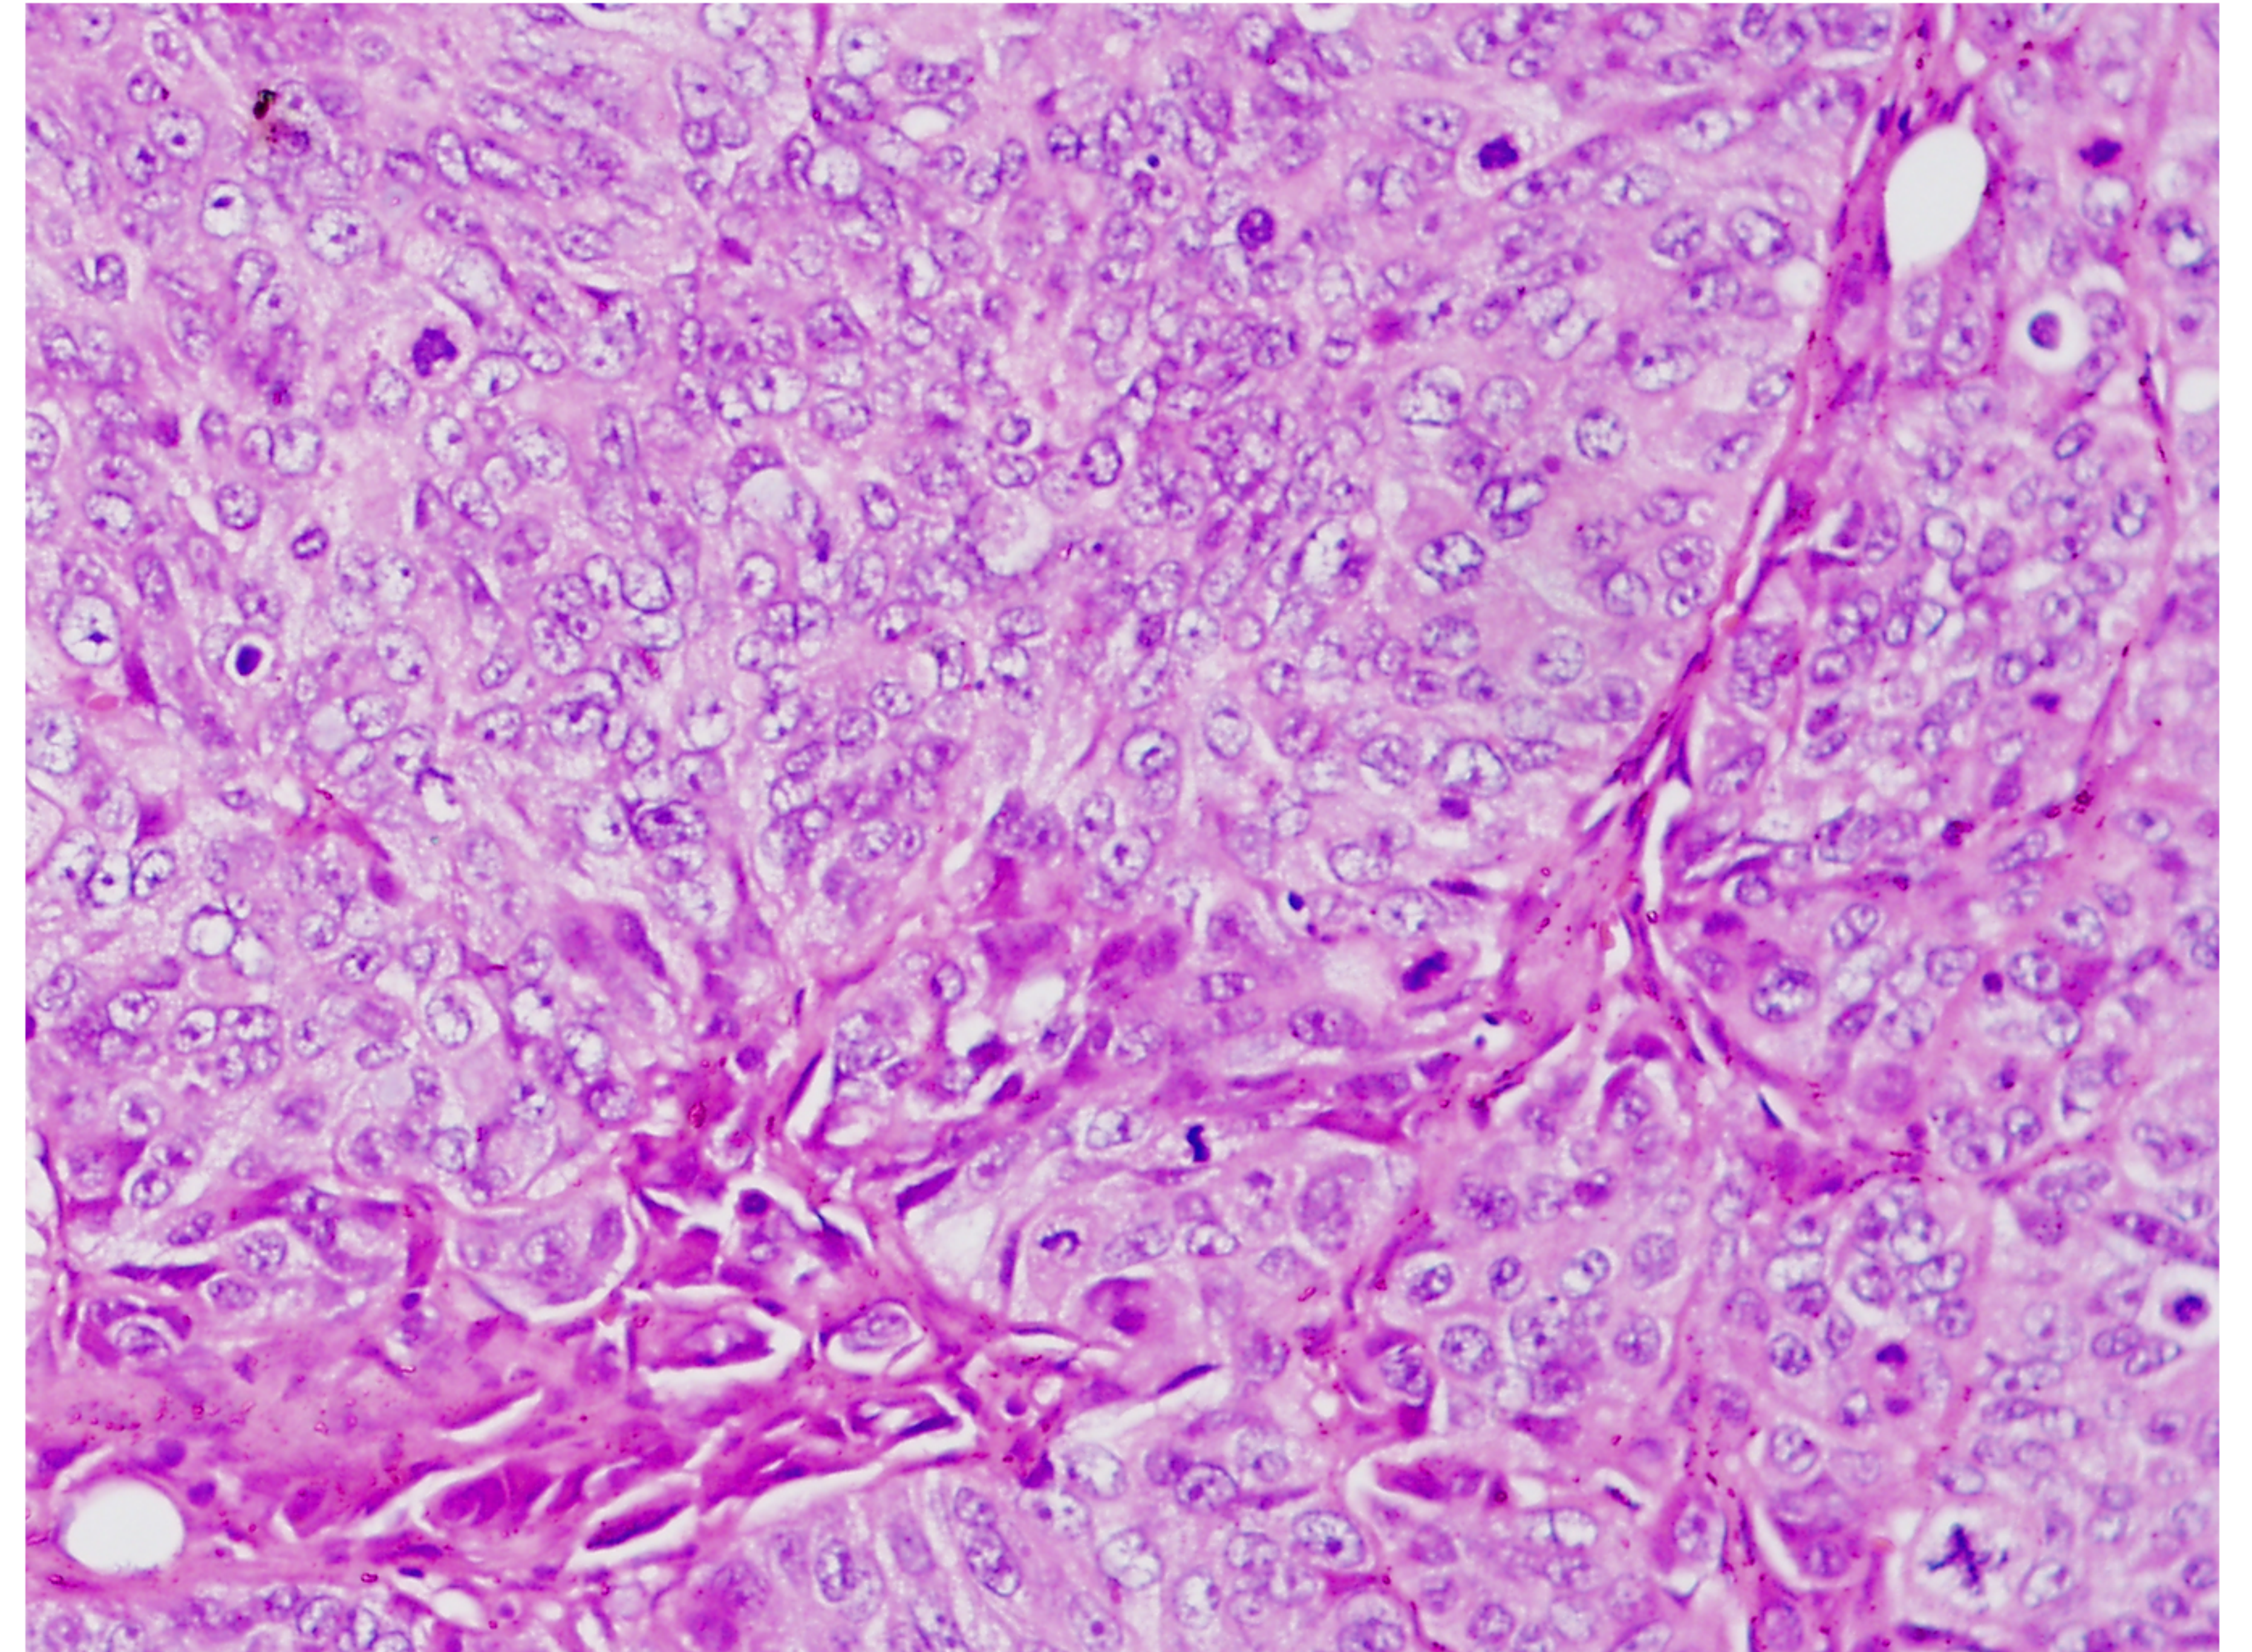

HT29 shNC Parental

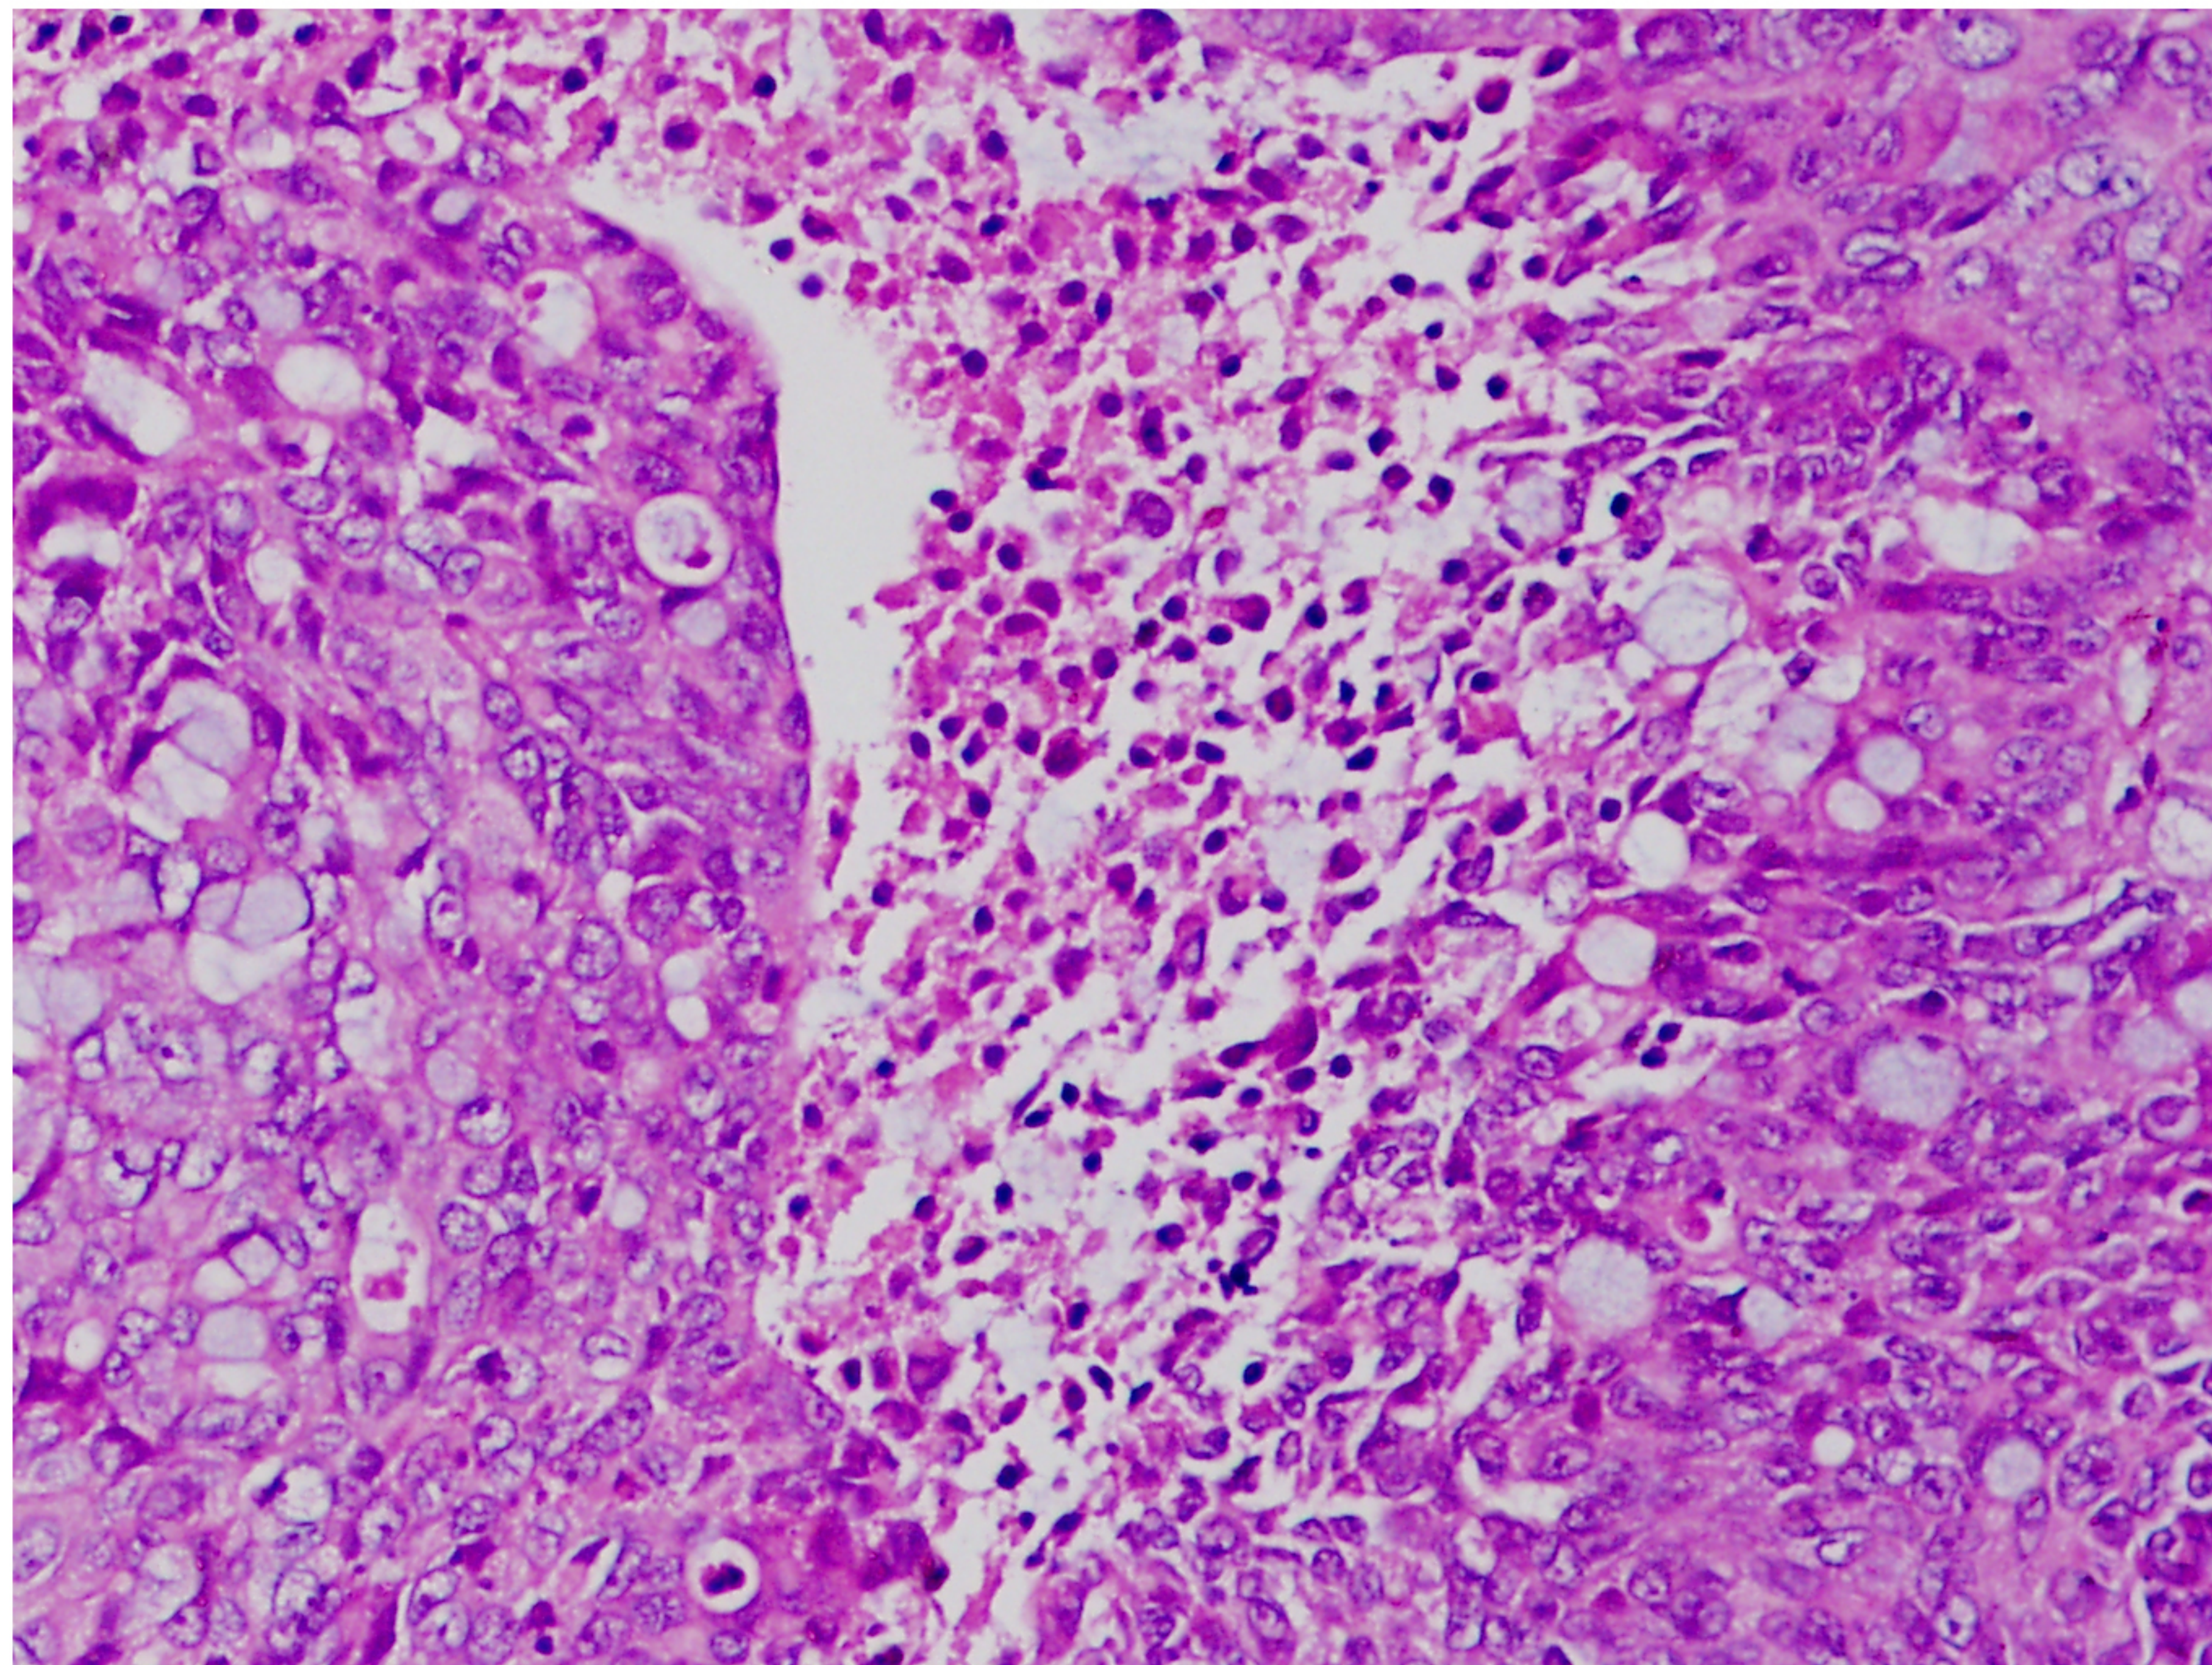

HT29 shDDX27 Parental

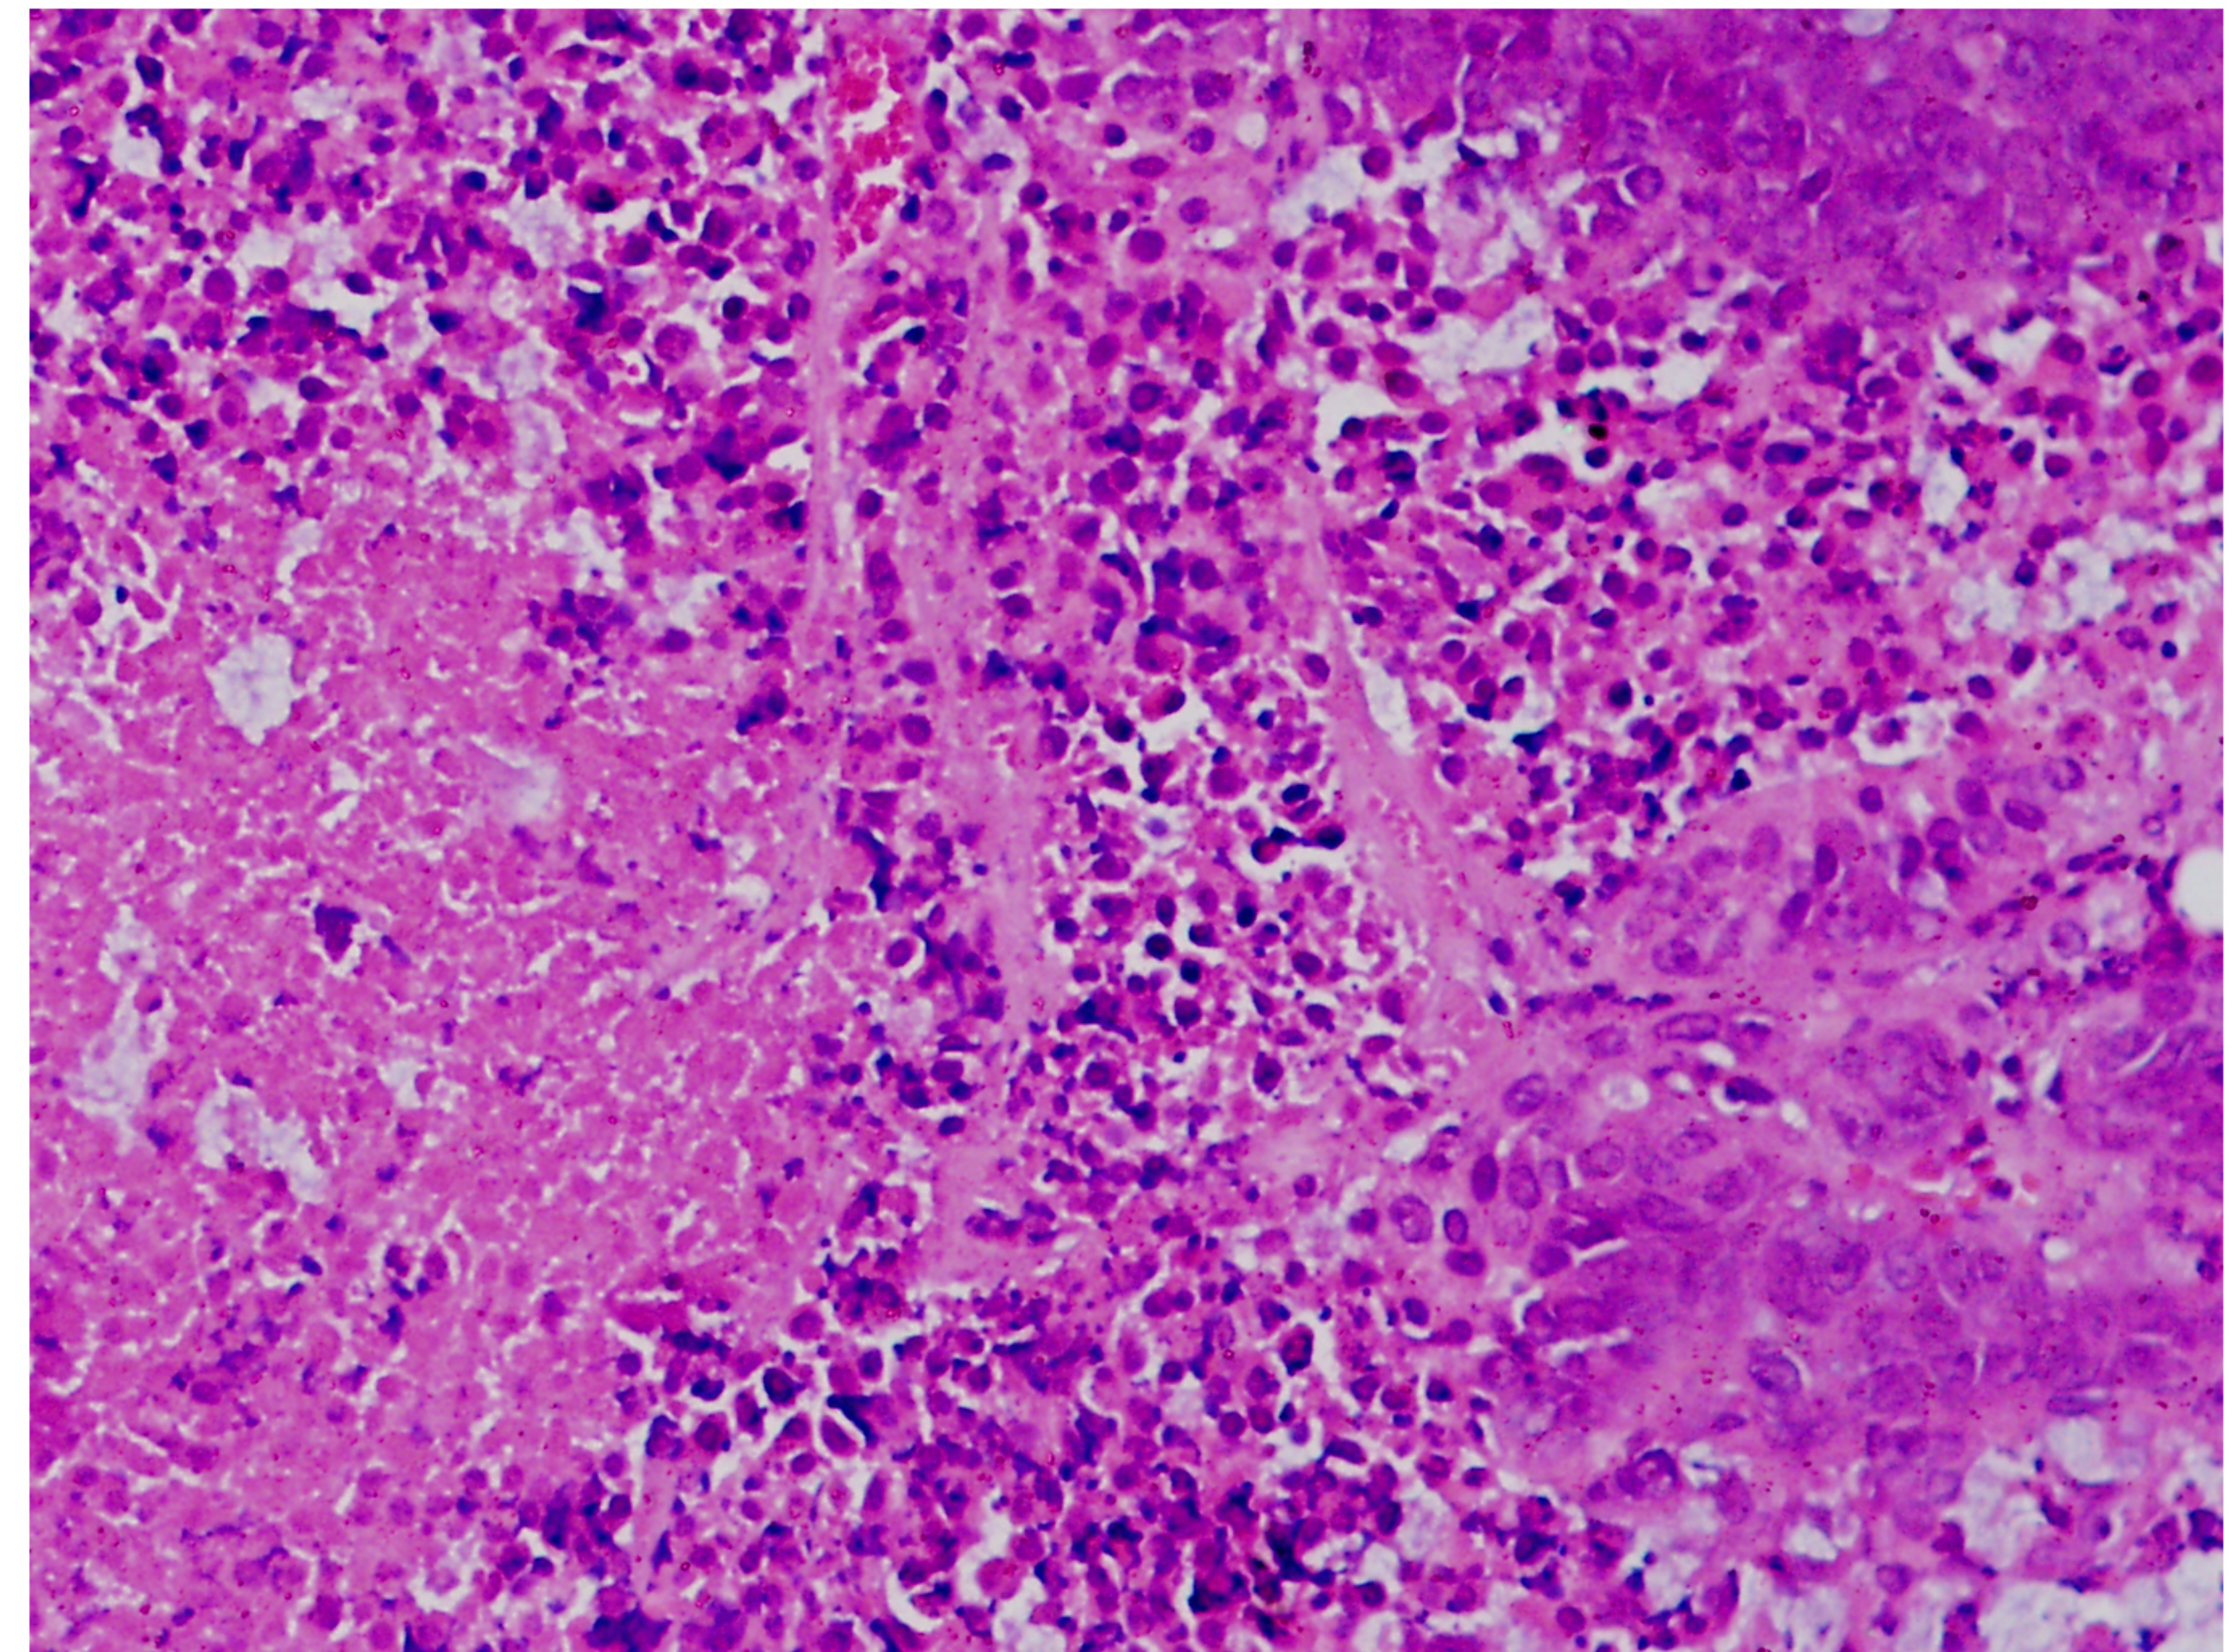

Supplement: Supplementary file 3 [file get_supplementary_file.php]
